# Supplementary material for: Nanostructured weathering steel for matrix-free laser desorption ionisation mass spectrometry and imaging of metabolites, drugs and complex glycans
Source: Royal Society of Chemistry journal article supplement (doi:10.1039/c4an00216d), 2014-01-01
Supplement: c4an00216d1.pdf [file c4an00216d1.pdf]

## Supporting Material

### Cost-efficient Sample Plates made from Weathering Steel for SALDI-MS

#### Authors

**Juan Etxebarria<sup>[a]</sup>, Javier Calvo<sup>[b]</sup>, , Niels-Christian Reichardt<sup>[a]</sup>**

#### Author address

<sup>[a]</sup> Biofunctional Nanomaterials Unit, CICbiomaGUNE, Paseo Miramón 182, 20009 San Sebastian, Spain

<sup>[b]</sup> Mass Spectrometry Platform, CICbiomaGUNE, Paseo Miramón 182, 20009 San Sebastian, Spain

*Surface characterization.*

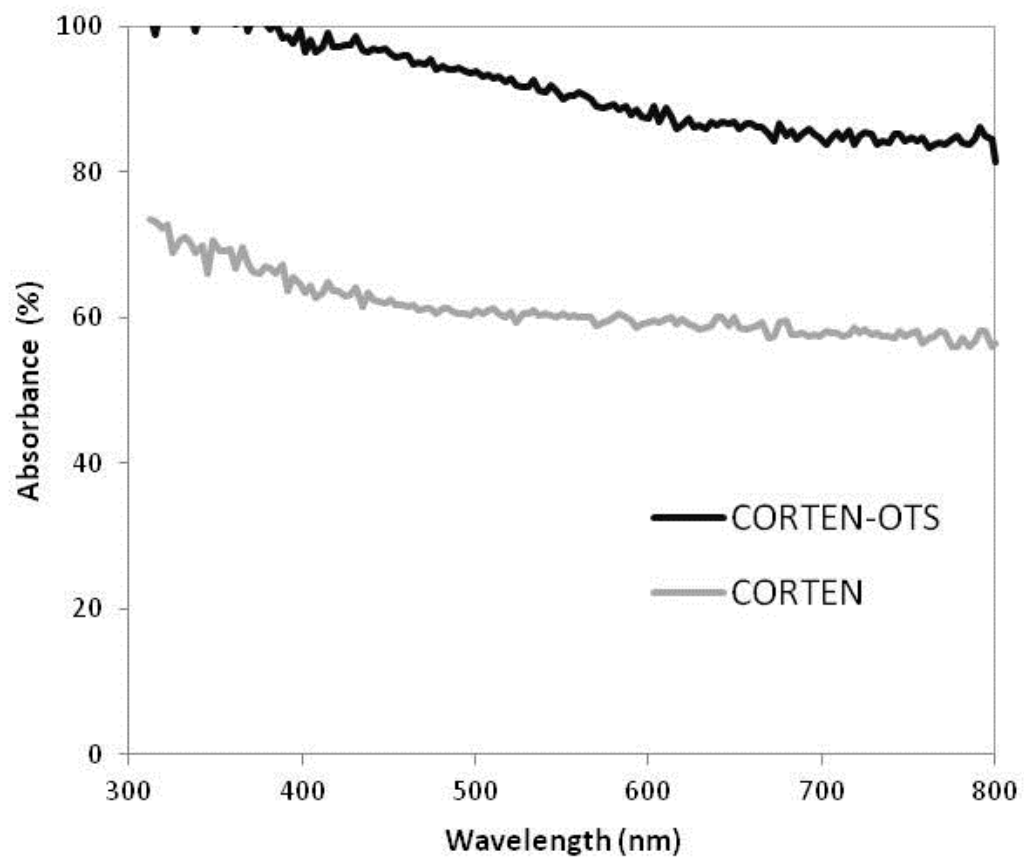

**Figure S-1.** Absorbance spectra of the polished and OTS-coated weathering steel plates.

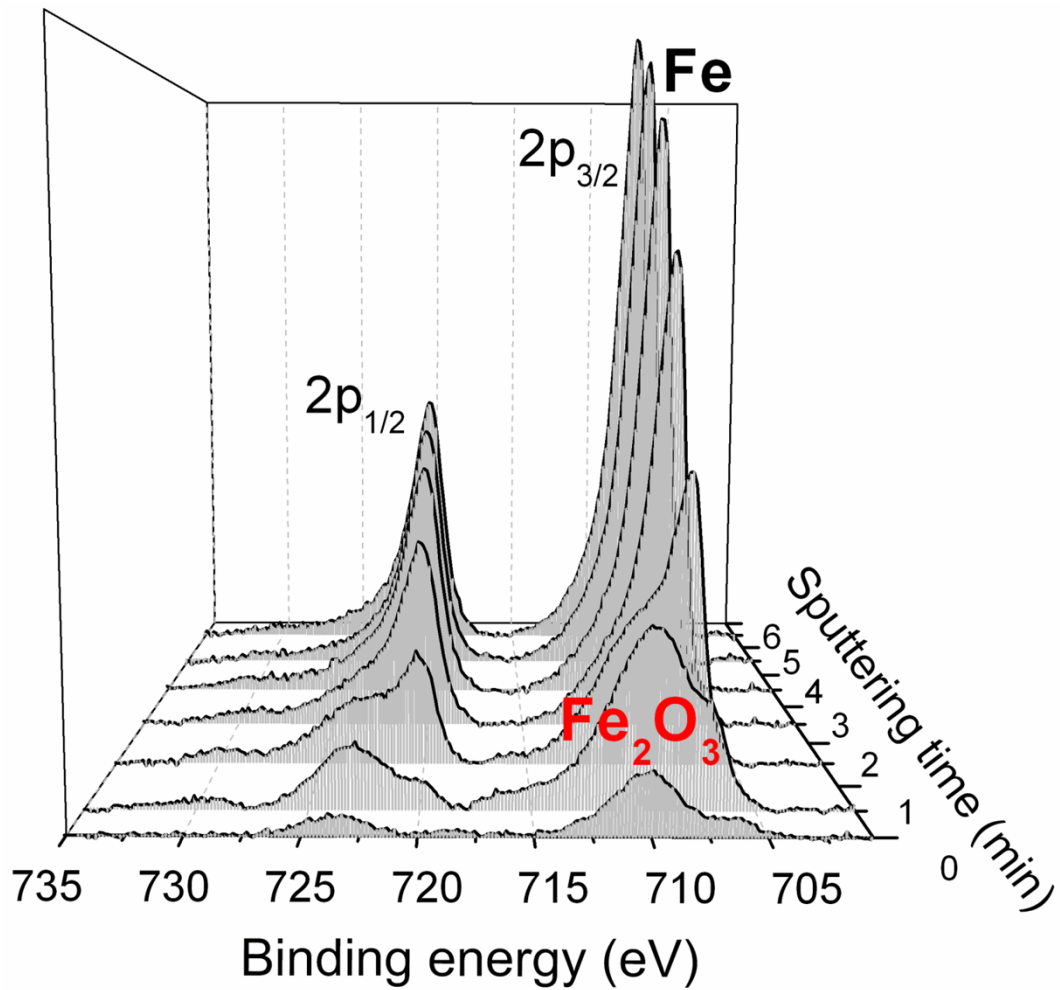

**Figure S-2.** Fe 2p spectra of the polished sample. In the Fe 2p spectra, two peaks are observed (doublet);  $2p_{3/2}$  and  $2p_{1/2}$ . The measurement on the surface ( $t = 0$  min) shows a spectrum with the presence of  $Fe_2O_3$  and metallic Fe components, at around 710.4 eV and 707.2 eV, respectively, in the  $2p_{3/2}$  peak. Sputtering the surface with argon ions remove the  $Fe_2O_3$  layer created spontaneously on the Fe surface. After 4 min of sputtering, the  $Fe_2O_3$  layer is completely removed and only metallic Fe is detected.

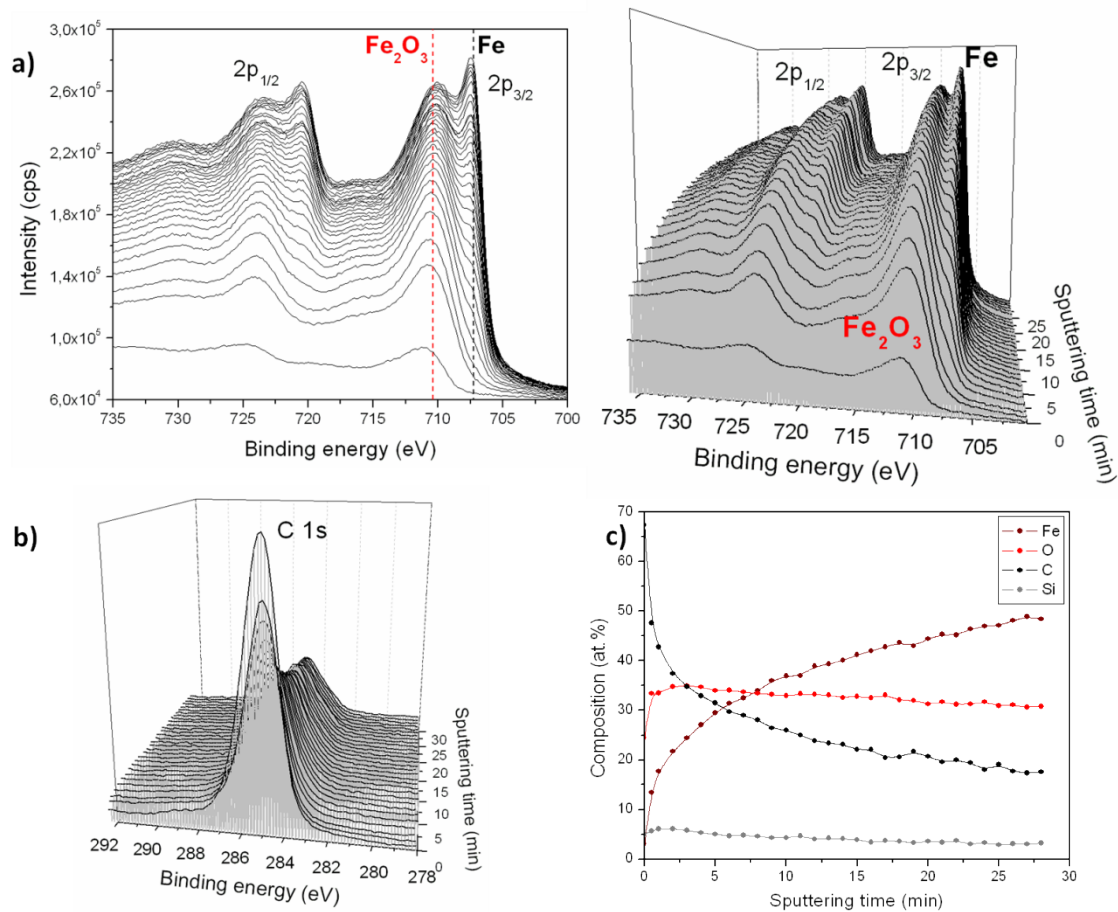

**Figure S-3. a)** Fe 2p spectra of the hydrophobic sample. Two peaks are observed (doublet);  $2p_{3/2}$  and  $2p_{1/2}$ . All the spectra show the presence of only the  $Fe_2O_3$  component. Even after sputtering the surface with argon ions during 28 min, the  $Fe_2O_3$  layer is not removed. At higher sputtering times, a “shoulder” in the spectra assigned to metallic Fe appears and is due to reduction of the  $Fe_2O_3$  to Fe by the argon ions. **b)** C 1s spectra of the hydrophobic sample at different sputtering times show the presence of the octadecyl-silane coating only at the surface. **c)** Composition ratios Fe/O/C/Si at different sputtering times.

COR-TEN plain

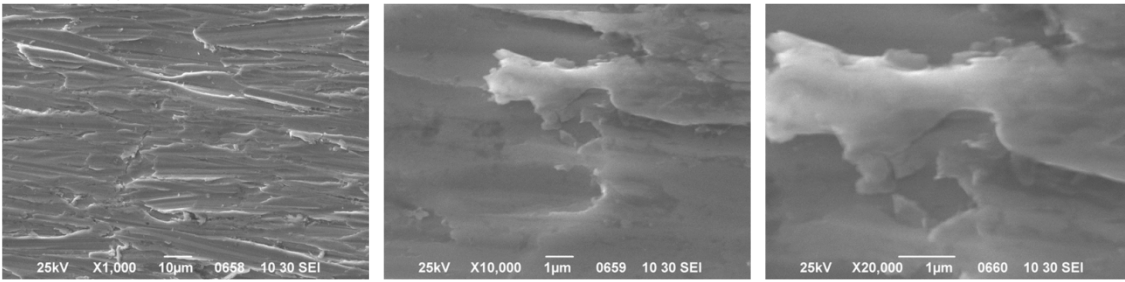

COR-TEN\_OTShydrophobic

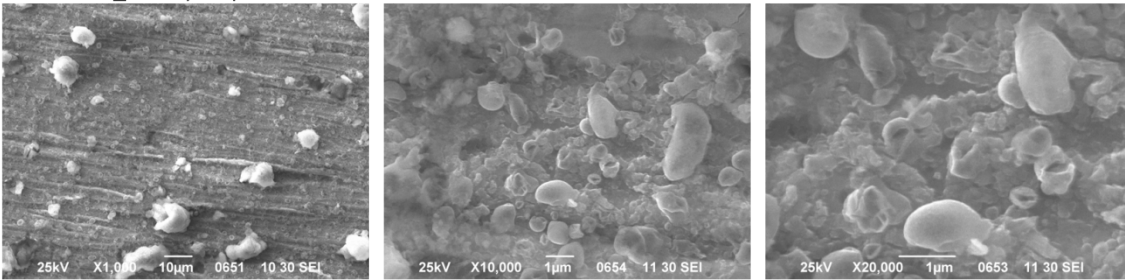

**Figure S-4.** SEM images of a polished weathering steel plate, before and after coating with OTS.

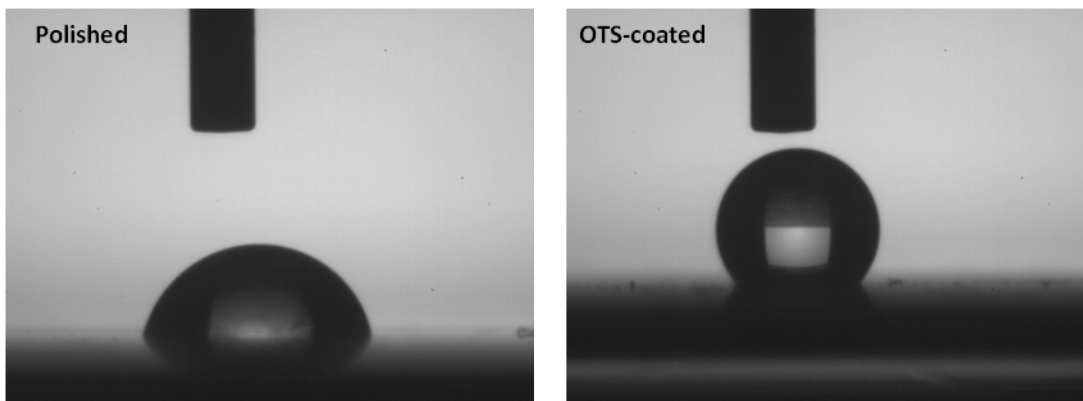

**Figure S-5.** Contact angle measurements on polished ( $\theta = 65 \pm 1^\circ$ ) and OTS-coated weathering steel slides ( $\theta = 128 \pm 1^\circ$ ).

## LDI performance..

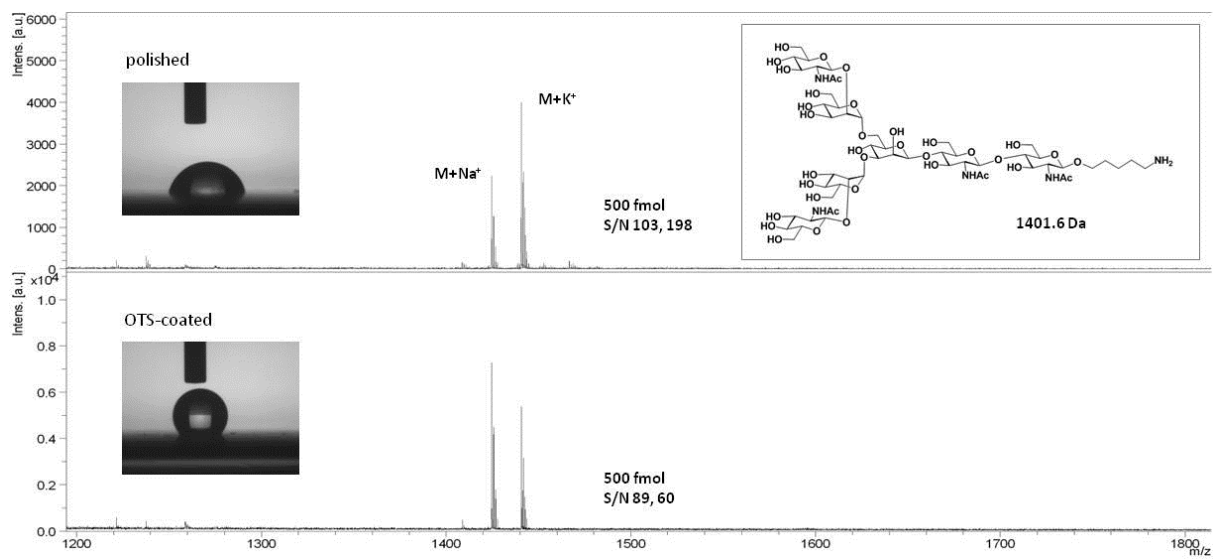

**Figure S-6.** SALDI spectra of biantennary glycan 1 (0.5 picomol) on polished weathering steel plate, and on OTS-coated weathering steel.

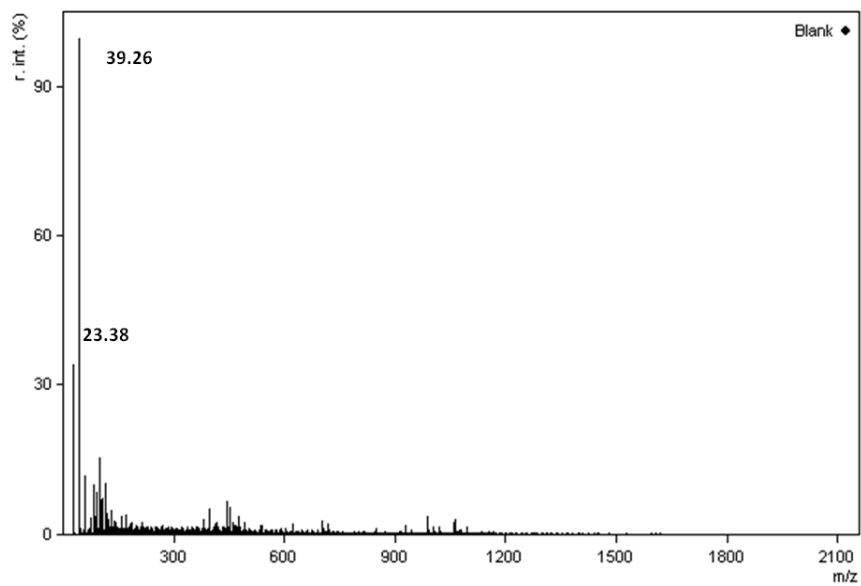

**Figure S-7.** Background ions on weathering steel

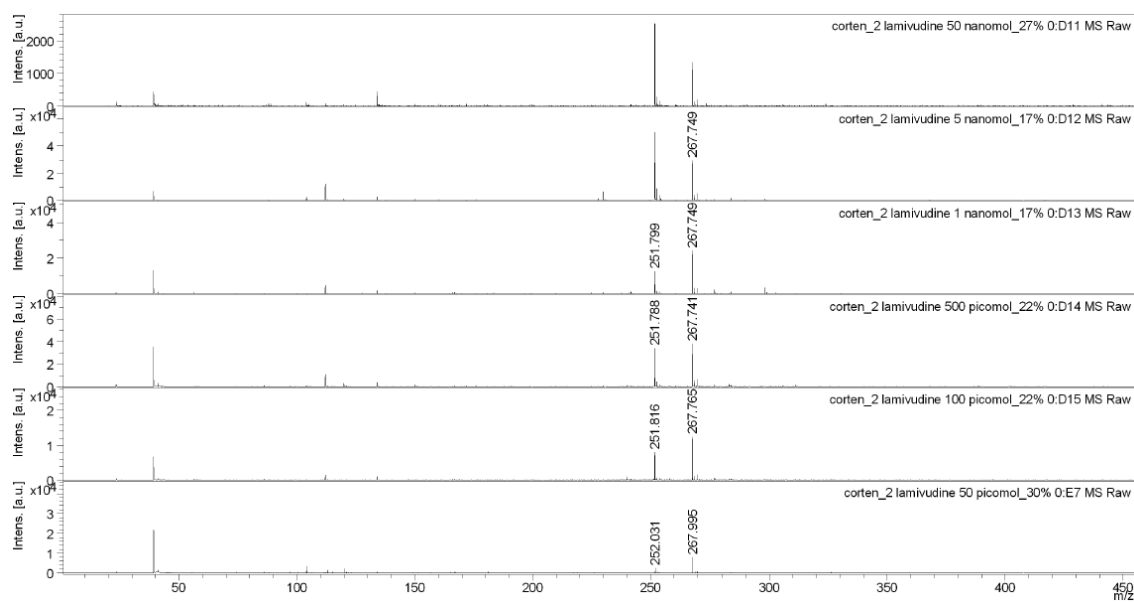

**Figure S-8.** Lamivudine detection by LDI on weathering steel.

### Isotopic dilution experiment.

Three replicates of the sample were analysed by triplicate and the results obtained were averaged to give a lactose amount of 4.4 g/100 mL of milk with a coefficient of variation of 3.9 % which is in good agreement with the data given by the producers. The monoisotopic masses from the sodium adducts of both lactose and <sup>13</sup>C-lactose ions were analysed, taking into account the abundance coefficients for each signal as expressed in the formula:

$$C = C^* \times \frac{X_n^*}{X_n} \times \frac{I_n}{I_n^*}$$

- C - total concentration of the sample
- C\* - total concentration of the isotopically labeled standard
- X<sub>n</sub> - relative abundance of the isotopologue in the sample
- X<sub>n</sub><sup>\*</sup> - relative abundance of the isotopologue in the isotopically labeled standard
- I<sub>n</sub> - intensity of the isotopologue in the sample
- I<sub>n</sub><sup>\*</sup> - intensity of the isotopologue in the isotopically labeled standard

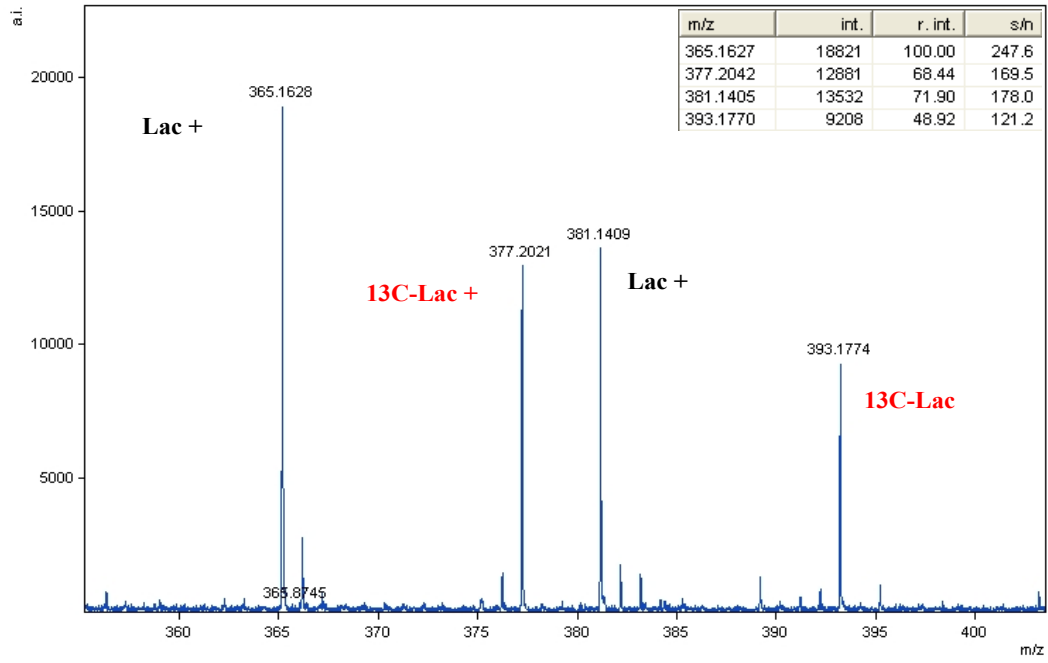

Figure S-9. Lactose quantification on milk.

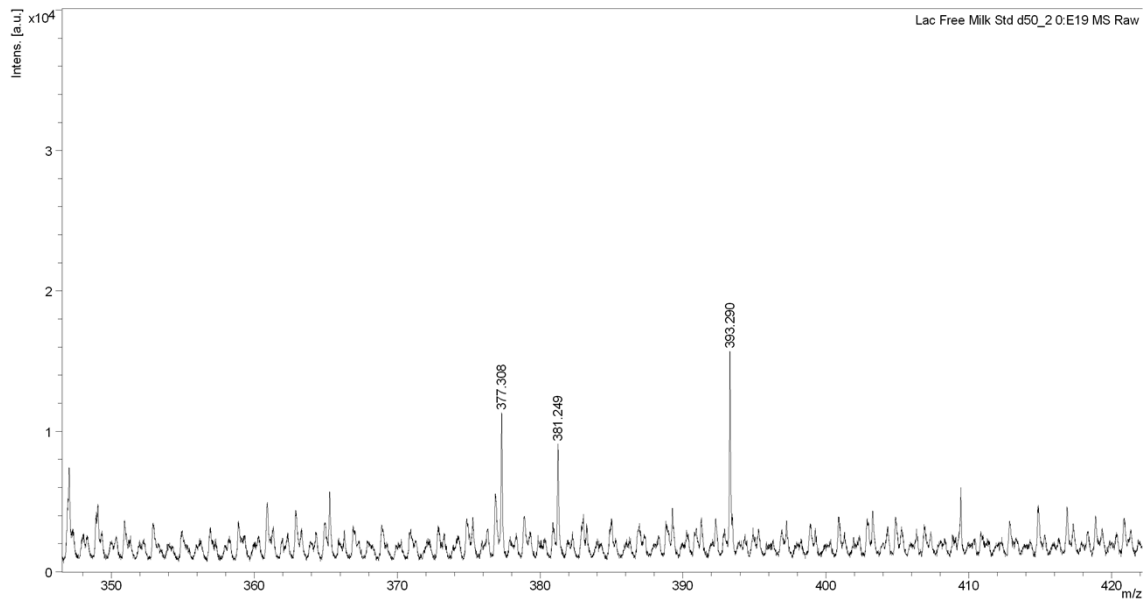

Figure S-10. Free-lactose milk was also analysed in the presence of the internal standard.



## LDI-Tissue imaging

Tissue 4 $\mu$ m on CORTEN-polished

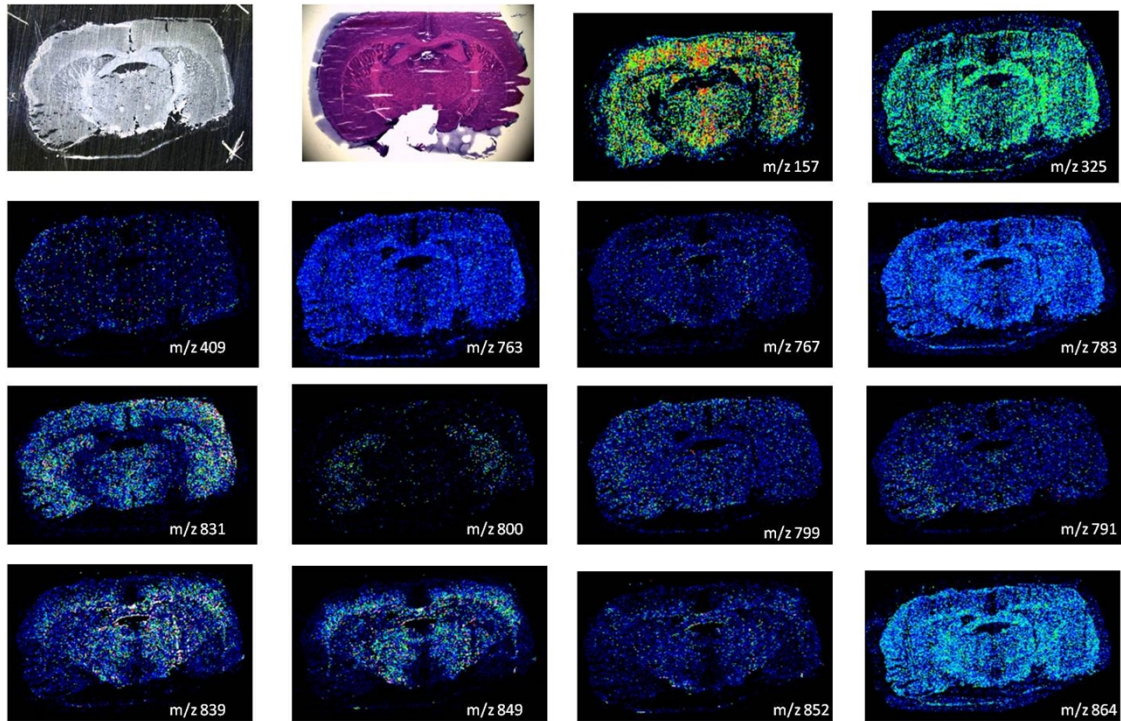

**Figure S-11.** Matrix-free LDI mass spectra collected from mouse brain tissue sections on a polished weathering steel slide. The tissue sections had not been processed after mounted in the target.

Tissue 4 $\mu$ m on CORTEN-OTS

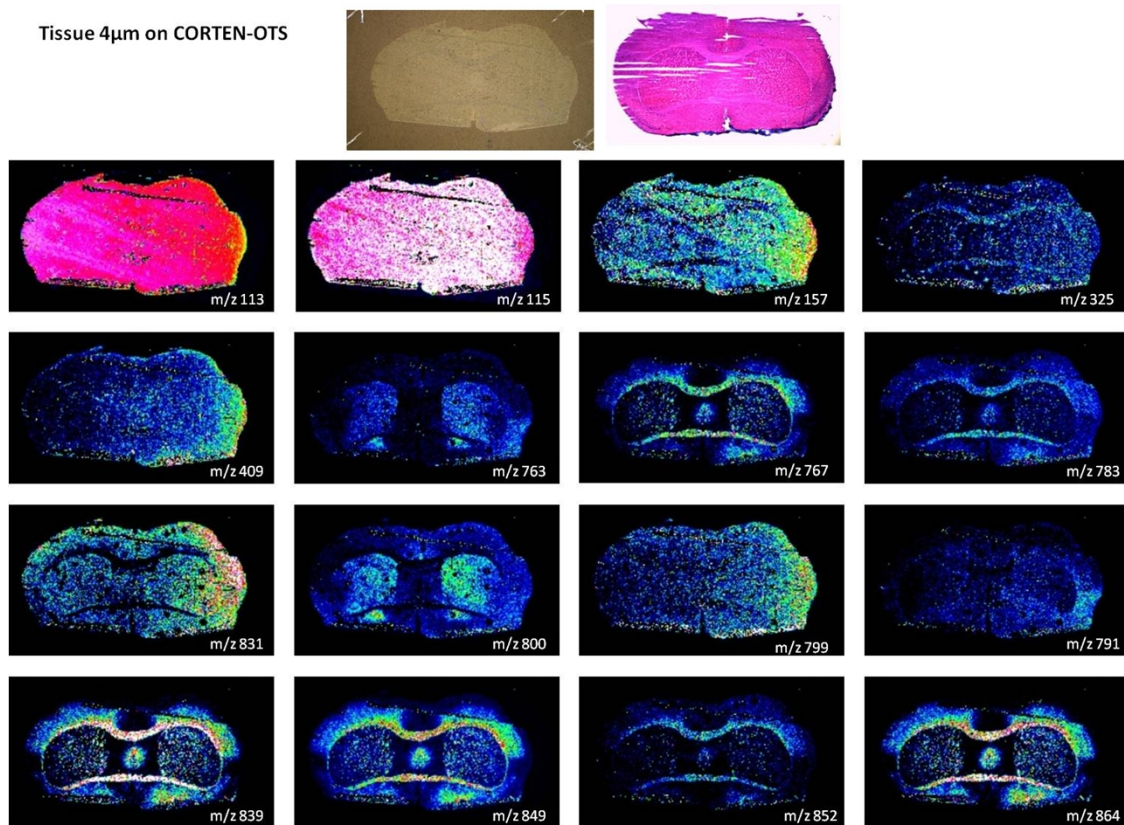

**Figure S-12.** Matrix-free LDI mass spectra collected from mouse brain tissue sections on a OTS coated weathering steel slide. The tissue sections had not been processed after mounted in the target.

Stamp CORTEN-OTS:

tissue removed in a stream of H<sub>2</sub>O with a syringe and washed by immersion in H<sub>2</sub>O

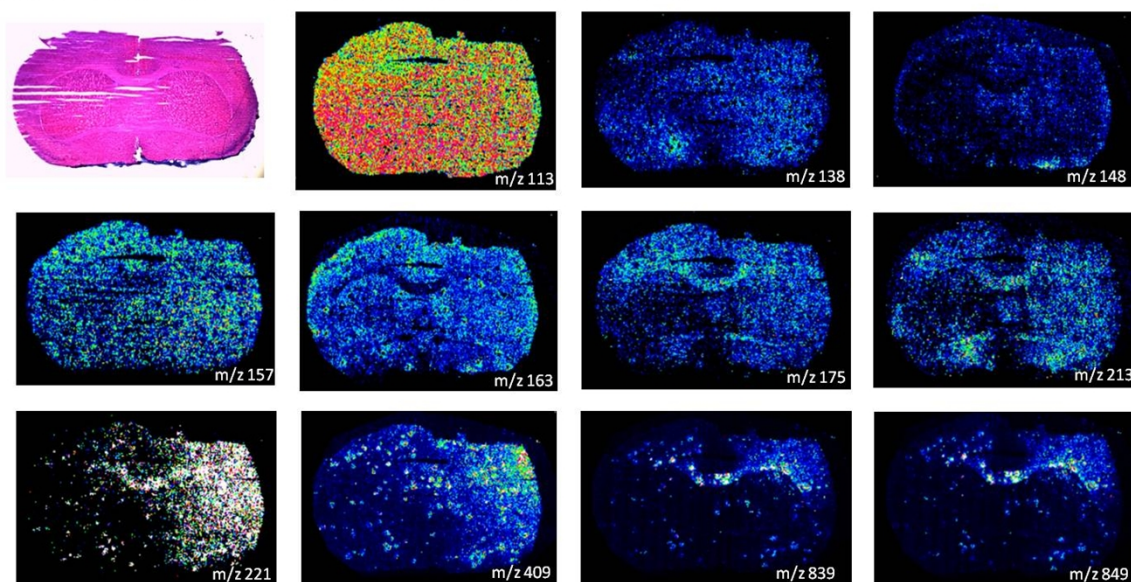

**Figure S-13.** Matrix-free LDI mass spectra collected after an aqueous washing of the brain tissue sections on a OTS coated weathering steel slide. The slide was dried with a stream of Ar after washing.
